# Supplementary material for: Dysbiosis and Accumulation of Antimicrobial Resistance in the Gut Bacterial Reservoir of Captive Sloth Bear (Melursus ursinus)
Source: Research Square preprint supplement (doi:10.21203/rs.3.rs-7941374/v1), 2025-10-28
Supplement: Supplementary file 1 [file 2aae48cd50727eadb545650f.docx]

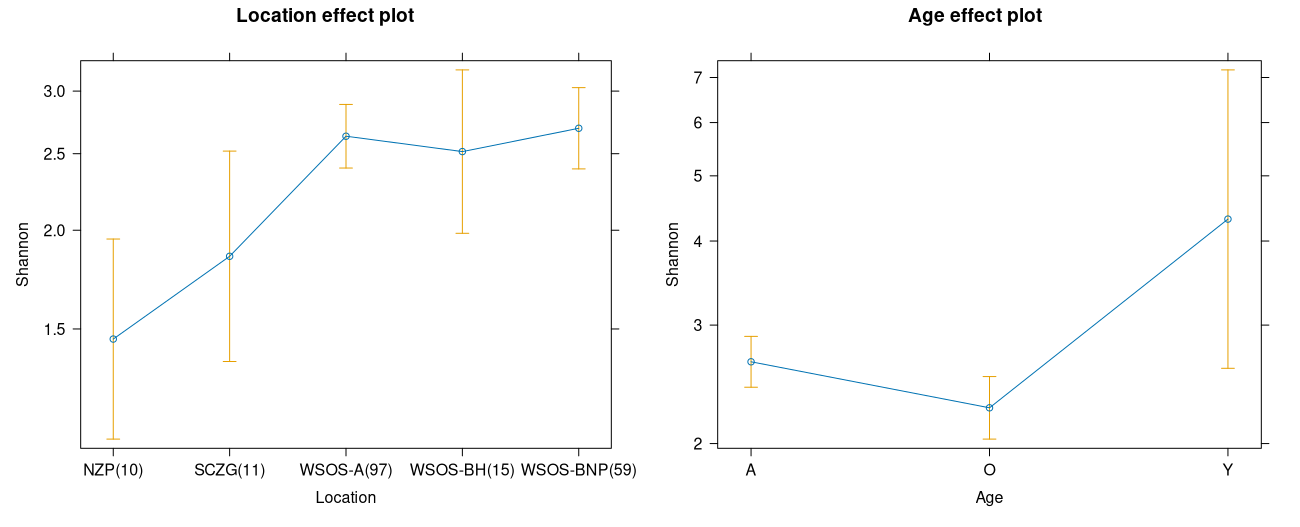


**Figure S3** Generalised linear model (GLM) outputs showing the influence of location and age of the animal on gut microbial diversities of captive sloth bears
