# Supplementary material for: Dysbiosis and Accumulation of Antimicrobial Resistance in the Gut Bacterial Reservoir of Captive Sloth Bear (Melursus ursinus)
Source: Research Square preprint supplement (doi:10.21203/rs.3.rs-7941374/v1), 2025-10-28
Supplement: Supplementary file 2 [file 5acb834bbaec576245846409.docx]

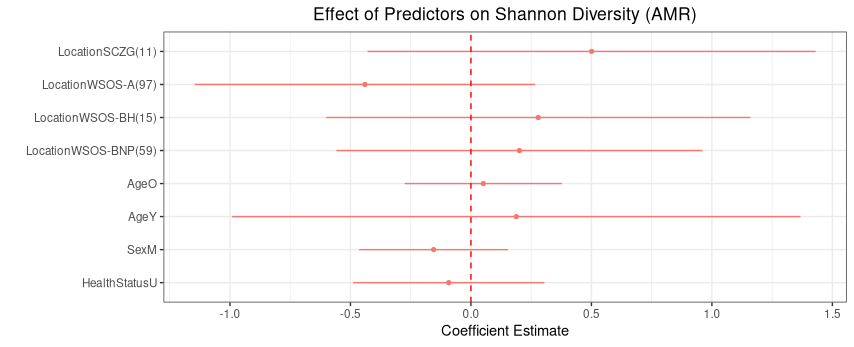


**Figure S5** GLM (Generalised linear model) and GLMM (Generalised linear mixed model) analyses on effects of different variables on AMR diversities in captive sloth bear
