# Supplementary material for: Dysbiosis and Accumulation of Antimicrobial Resistance in the Gut Bacterial Reservoir of Captive Sloth Bear (Melursus ursinus)
Source: Research Square preprint supplement (doi:10.21203/rs.3.rs-7941374/v1), 2025-10-28
Supplement: Supplementary file 3 [file bcfeae9b6115b8d5df12c4d5.docx]

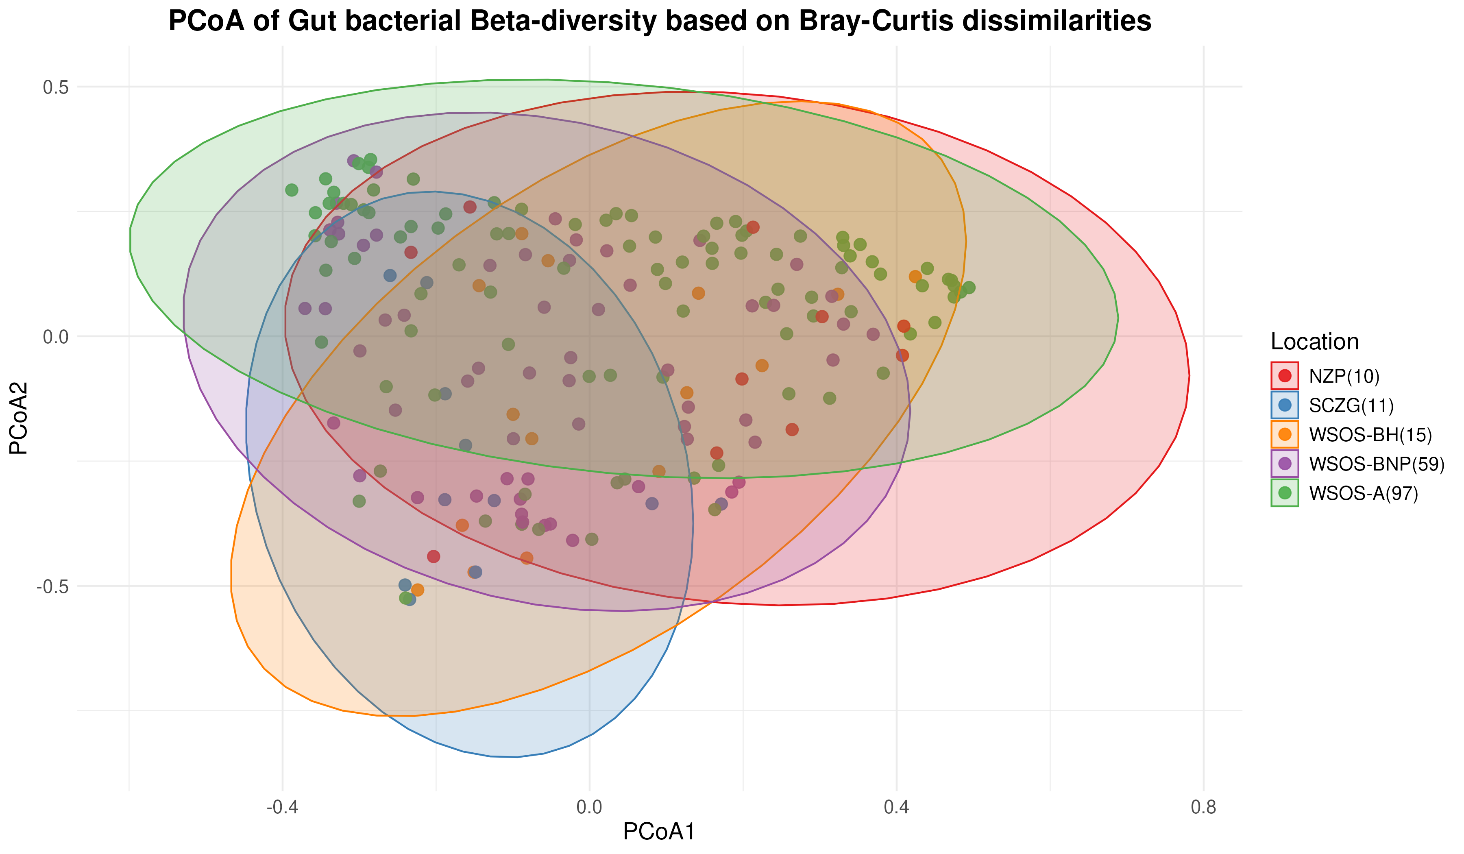


**Figure S4** Beta diversity plot based on Bray-Curtis dissimilarity matrix for gut microbial diversity in captive sloth bear
