# Supplementary material for: Dysbiosis and Accumulation of Antimicrobial Resistance in the Gut Bacterial Reservoir of Captive Sloth Bear (Melursus ursinus)
Source: Research Square preprint supplement (doi:10.21203/rs.3.rs-7941374/v1), 2025-10-28
Supplement: Supplementary file 5 [file f08c9dd4a6cdb7fd25e05db0.docx]

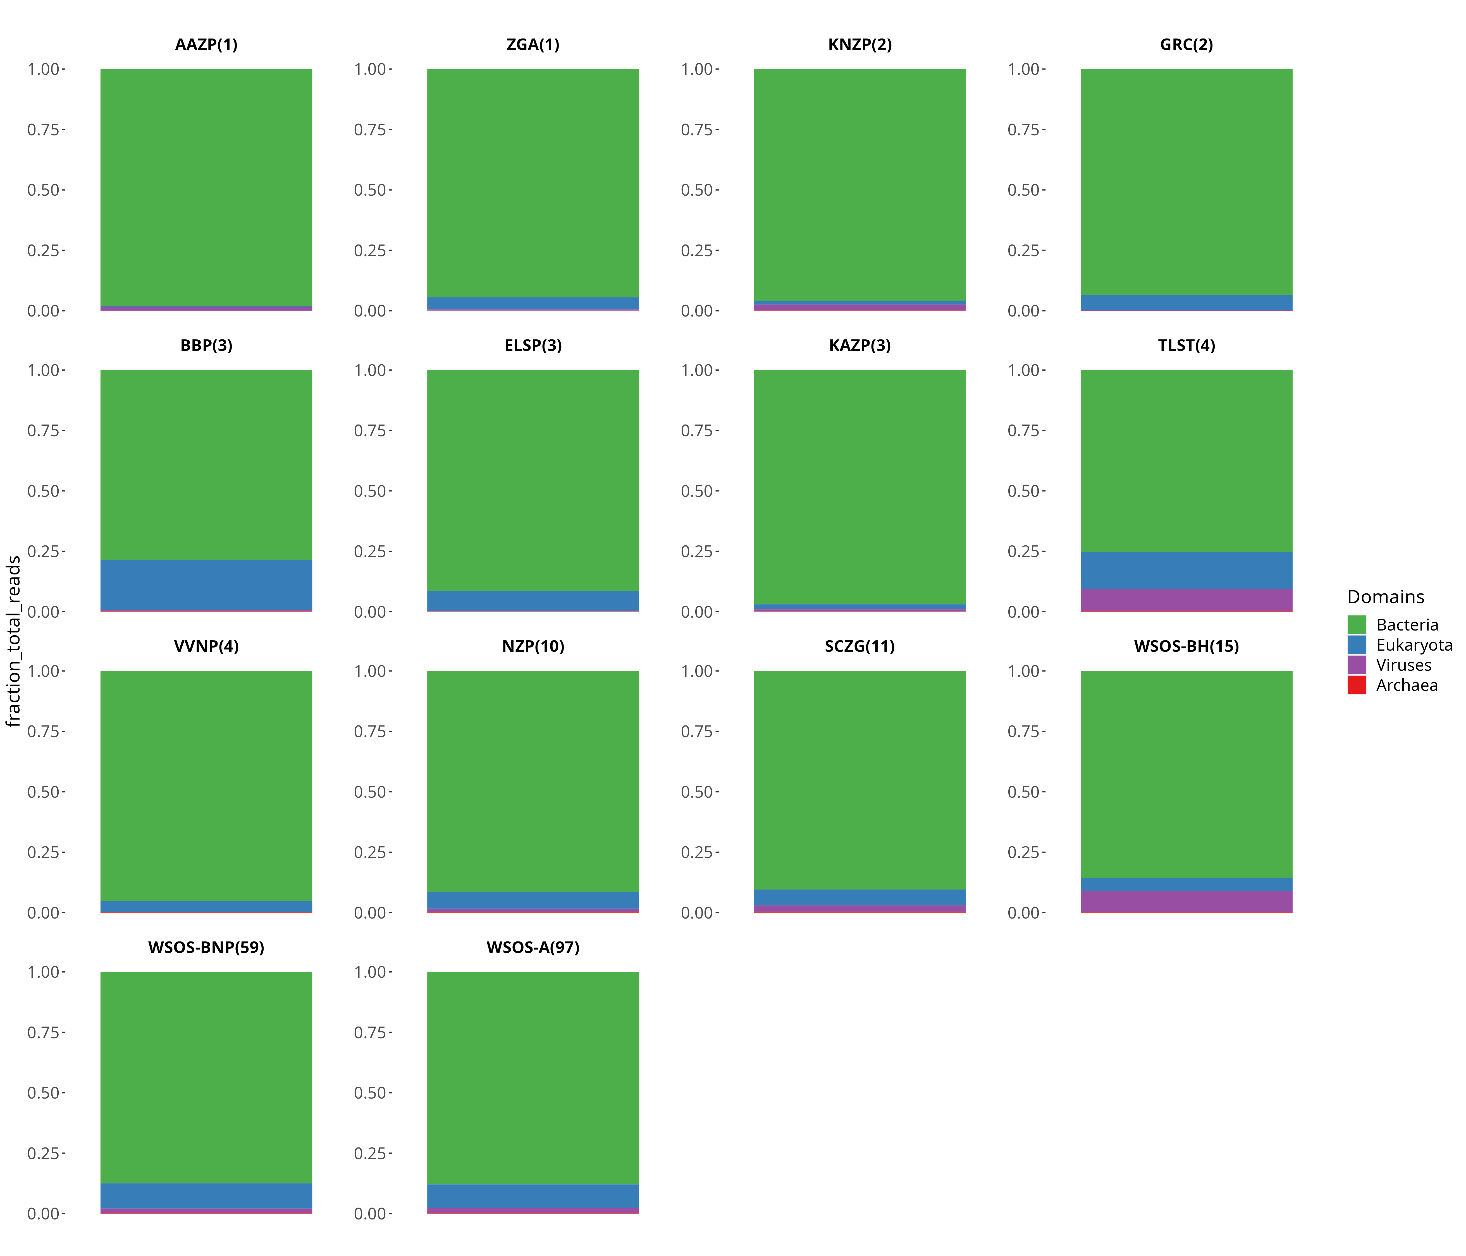


**Figure S1** Gut microbial community profile at the domain level in sloth bear samples from 14 captive locations in India
